# Supplementary material
Source: MDPI journal article supplement (doi:10.3390/horticulturae12050642)

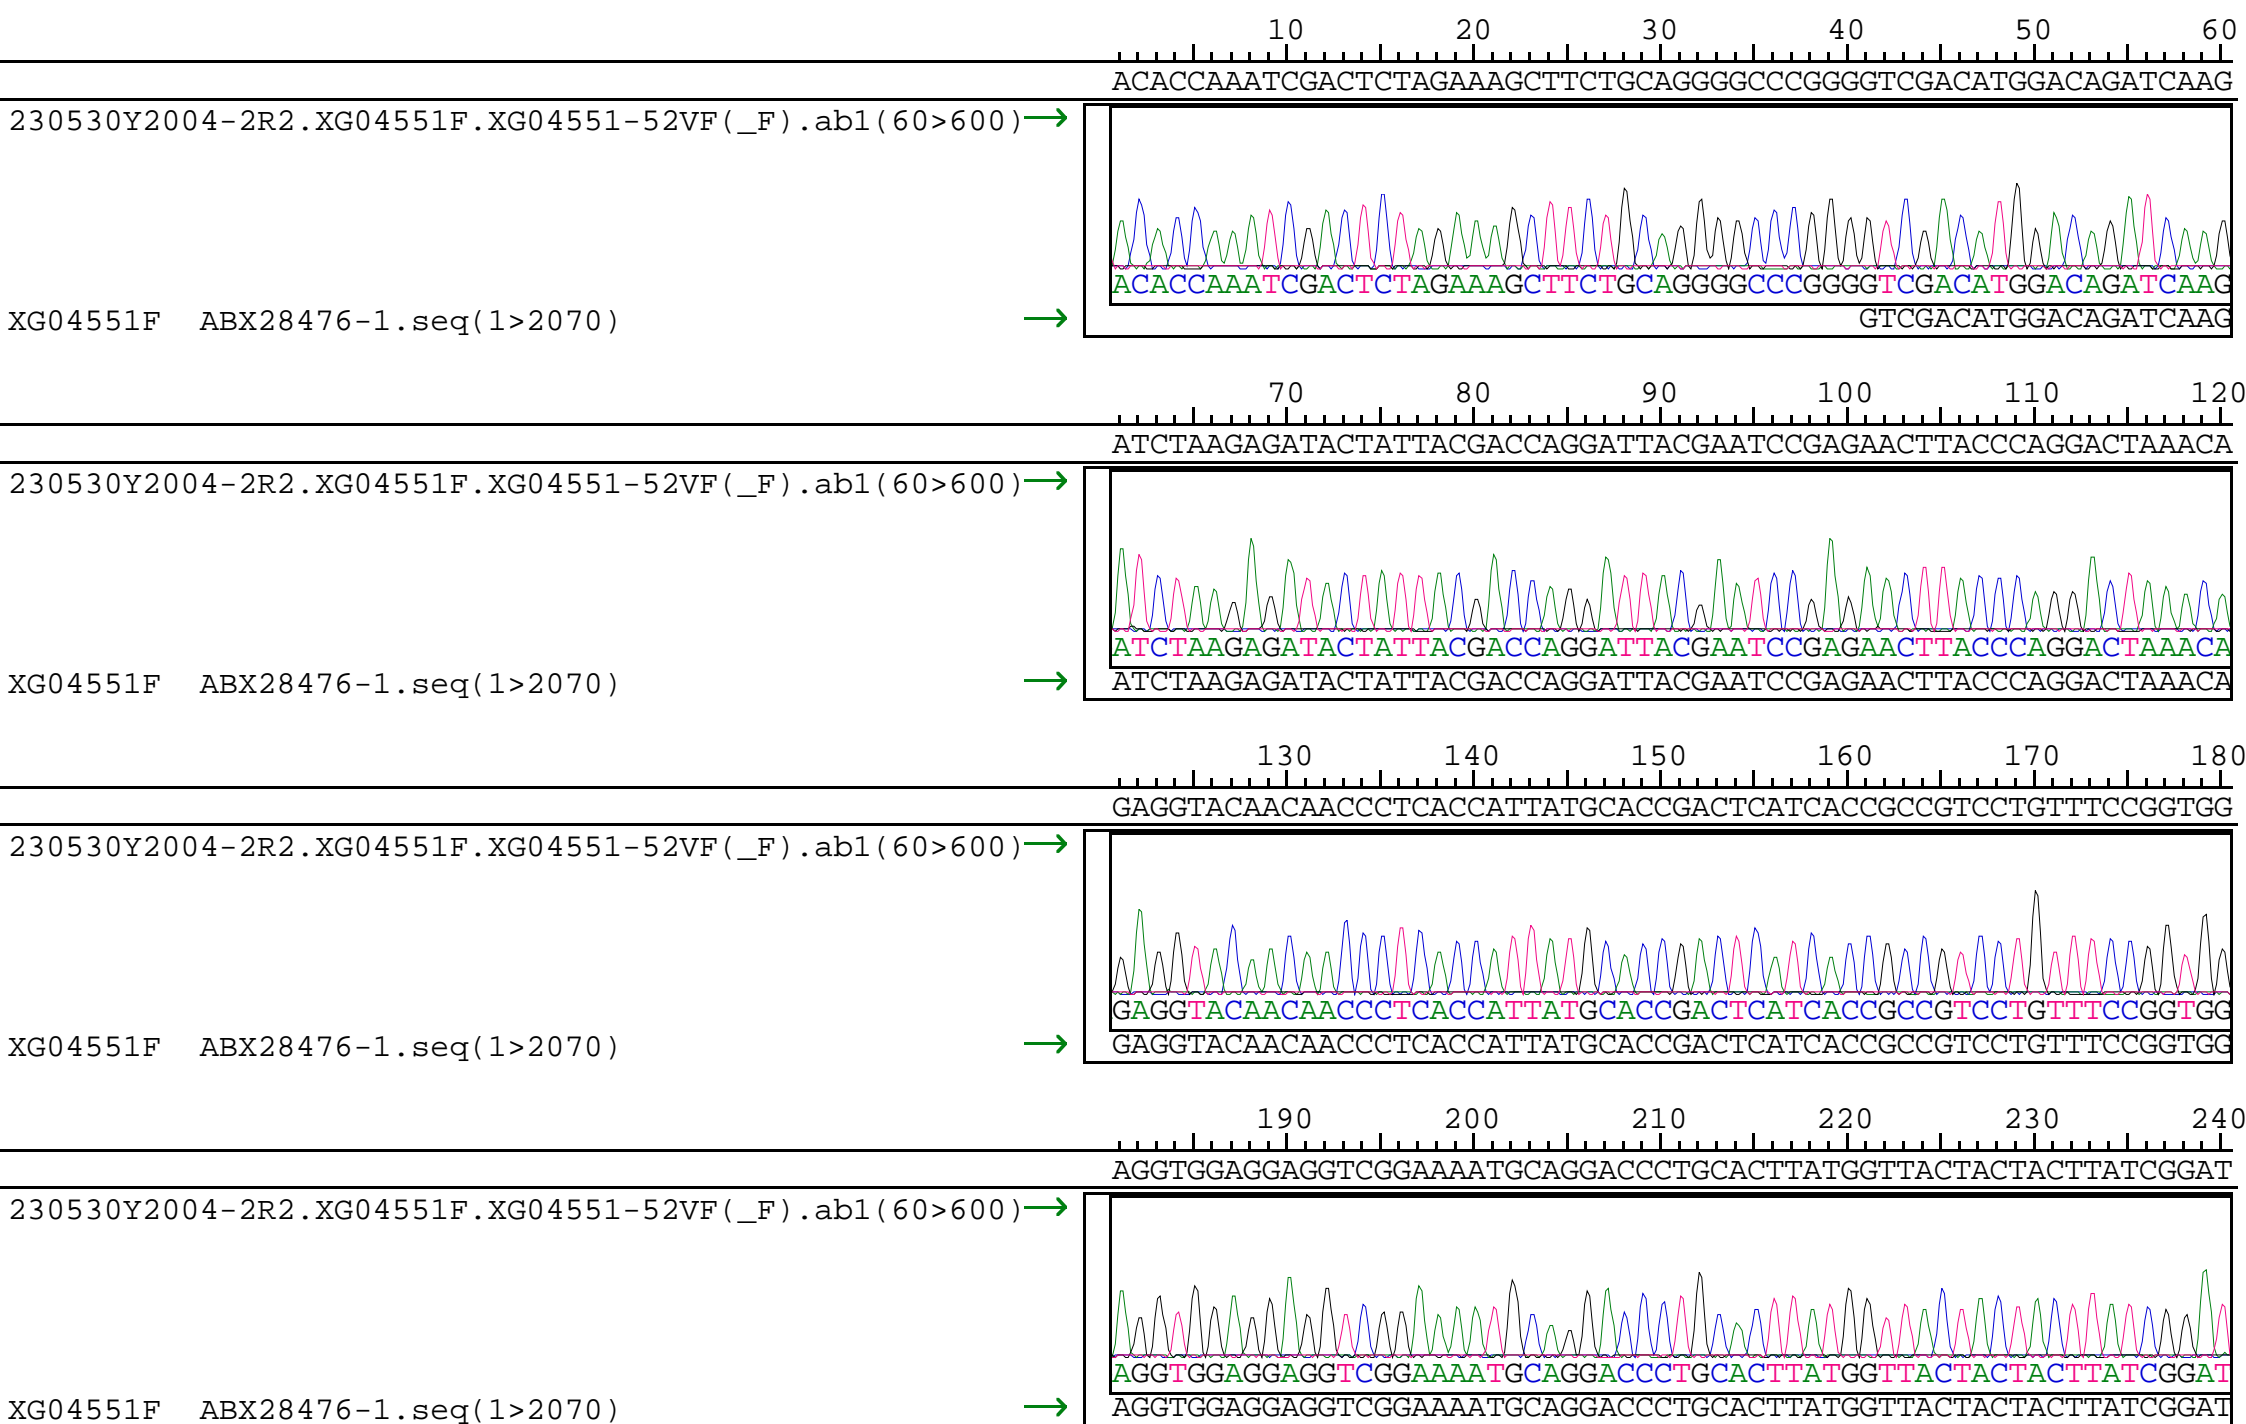

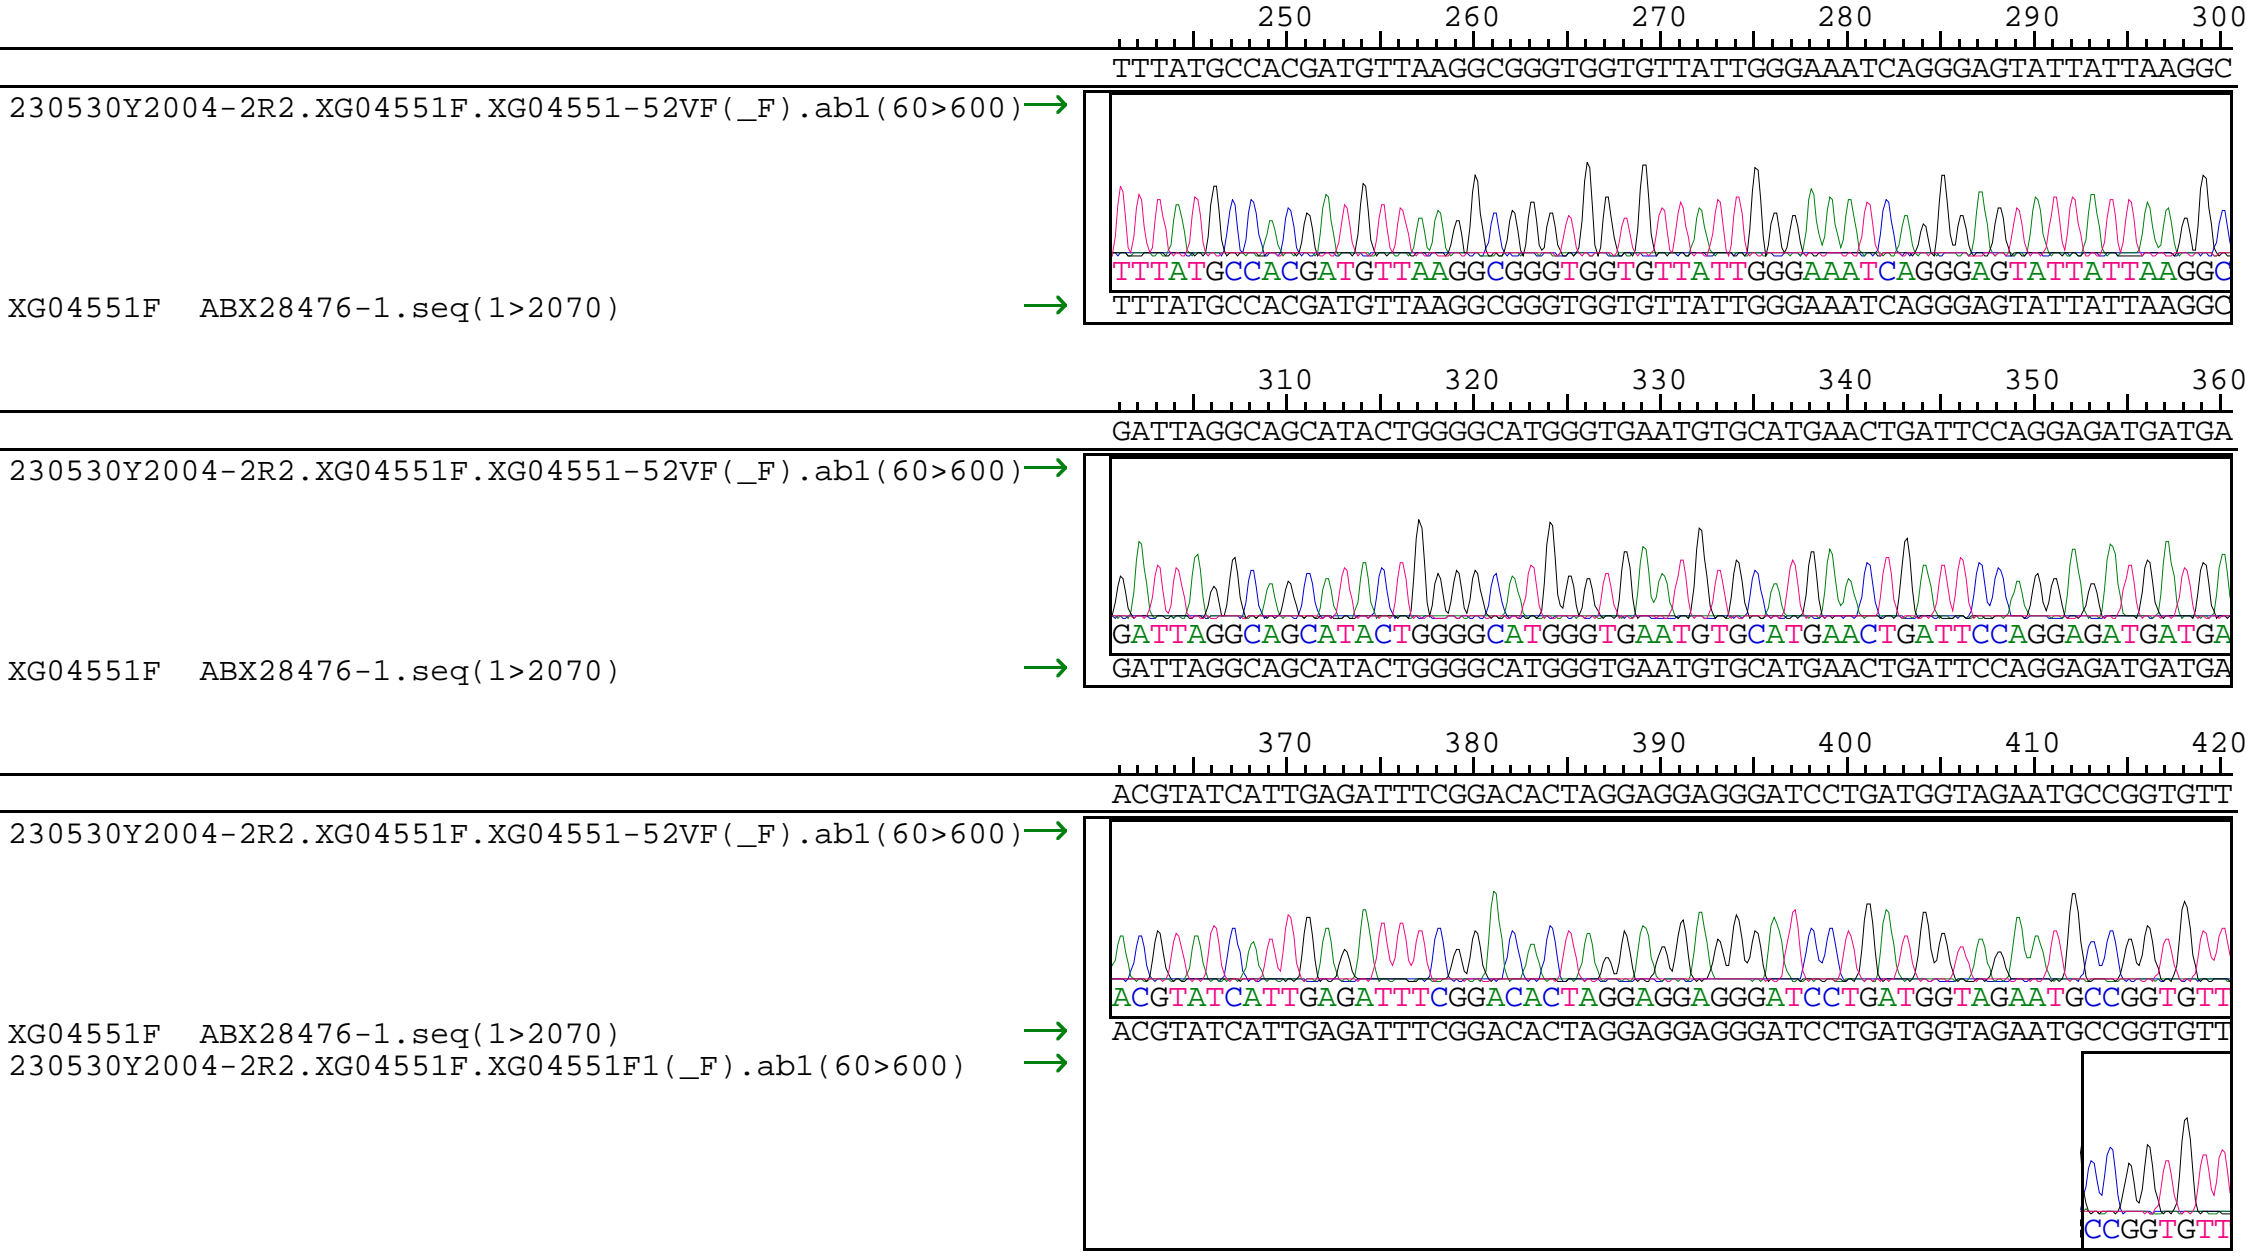

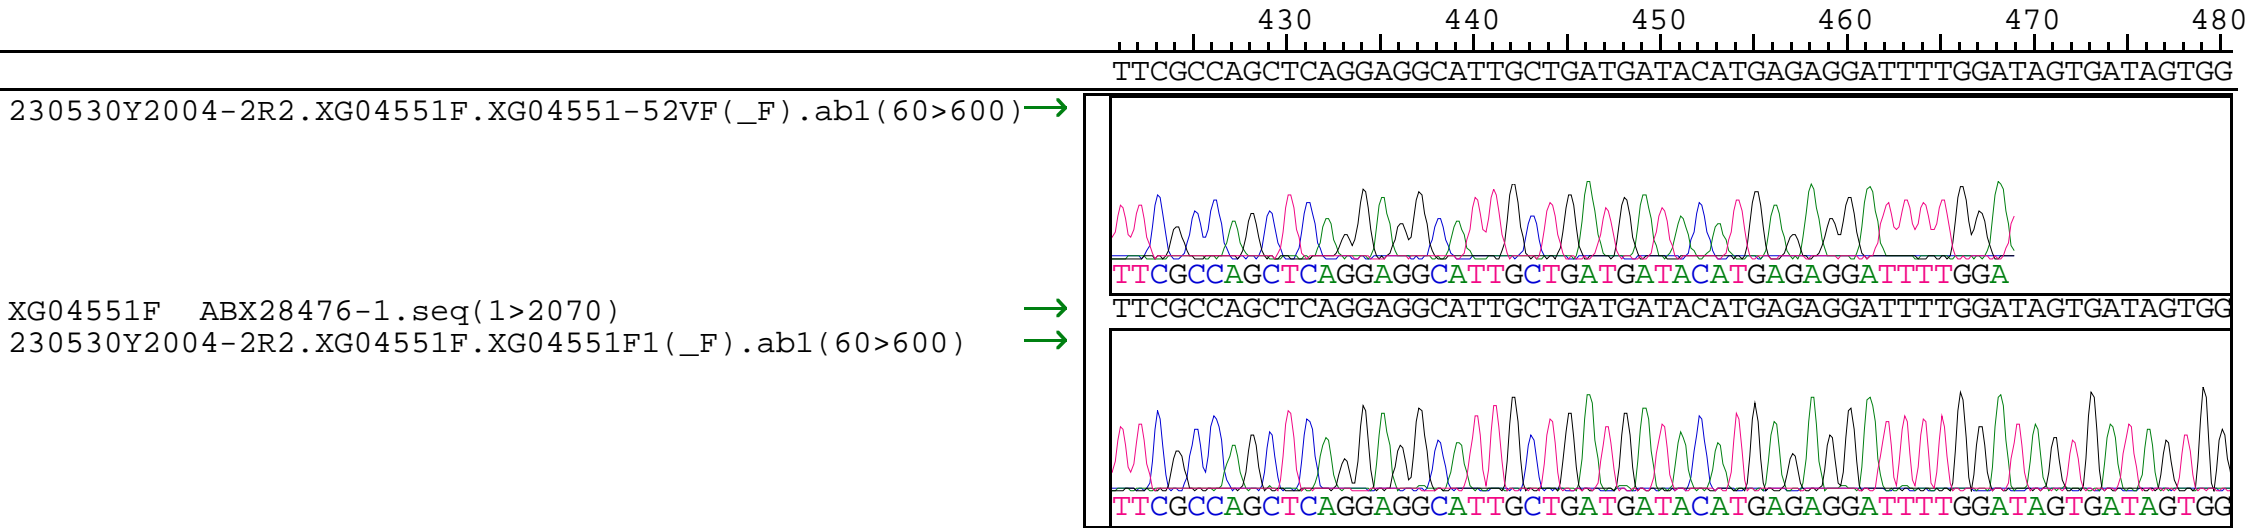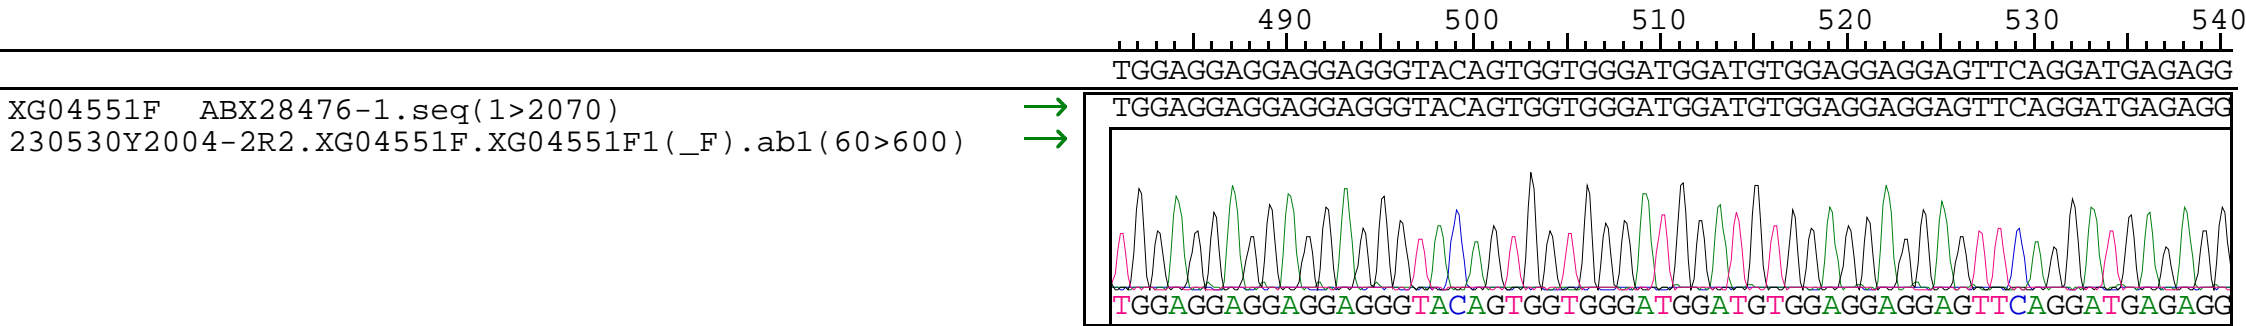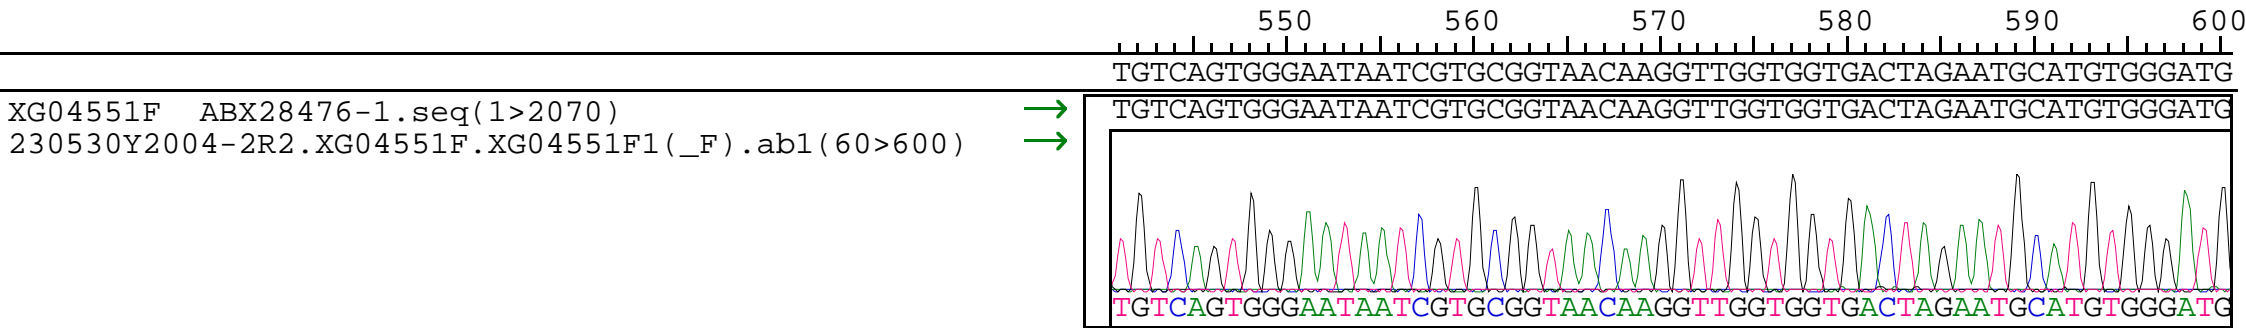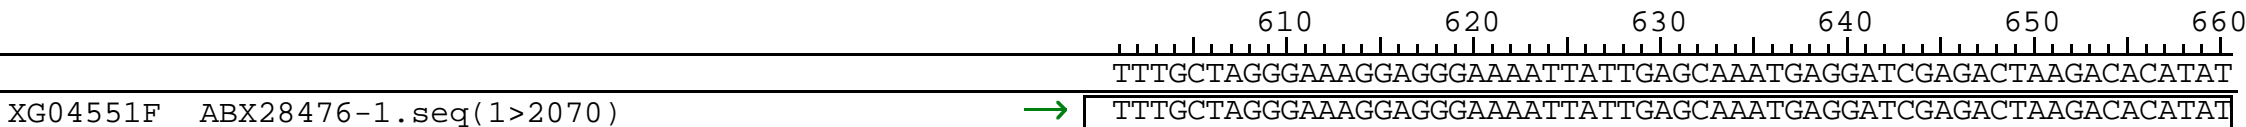

Project: XG04551F ABX28476-1.SQD Contig 54

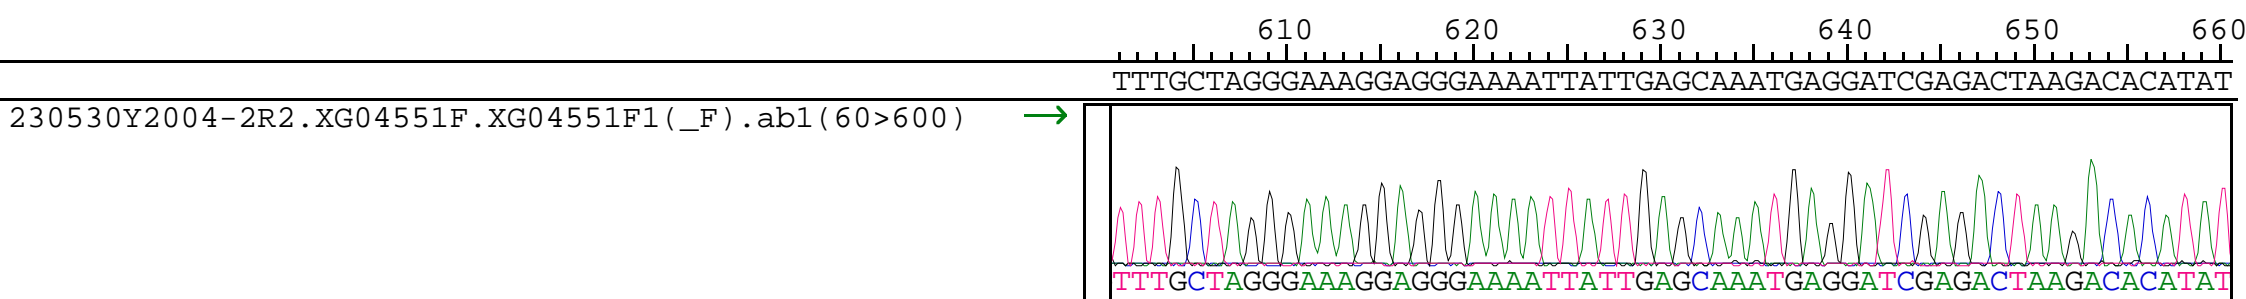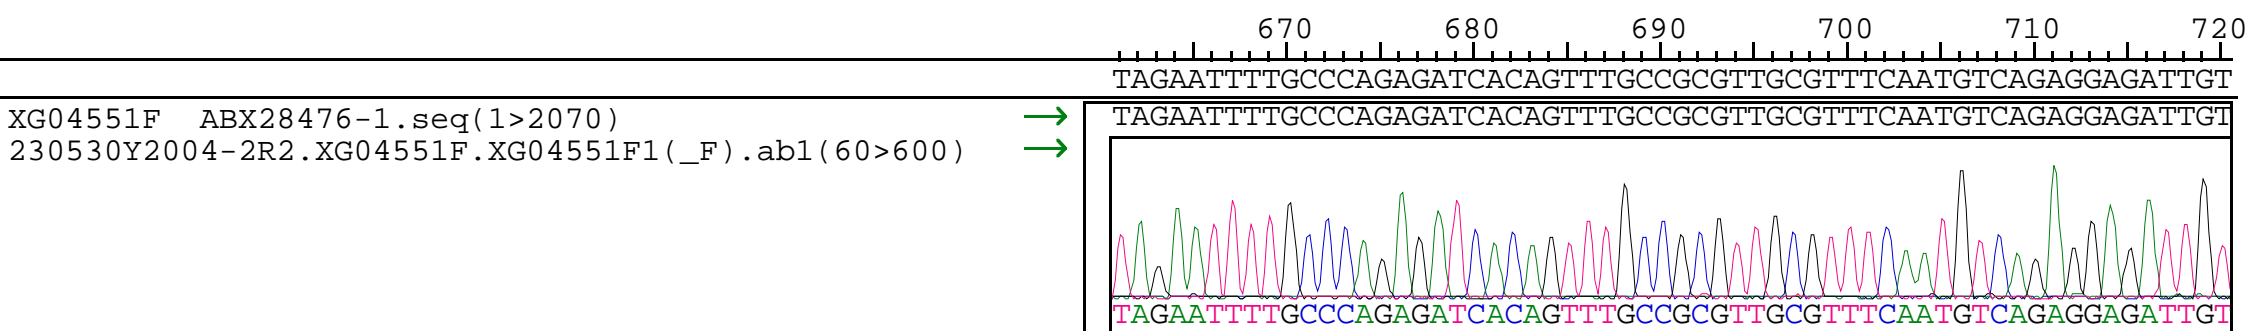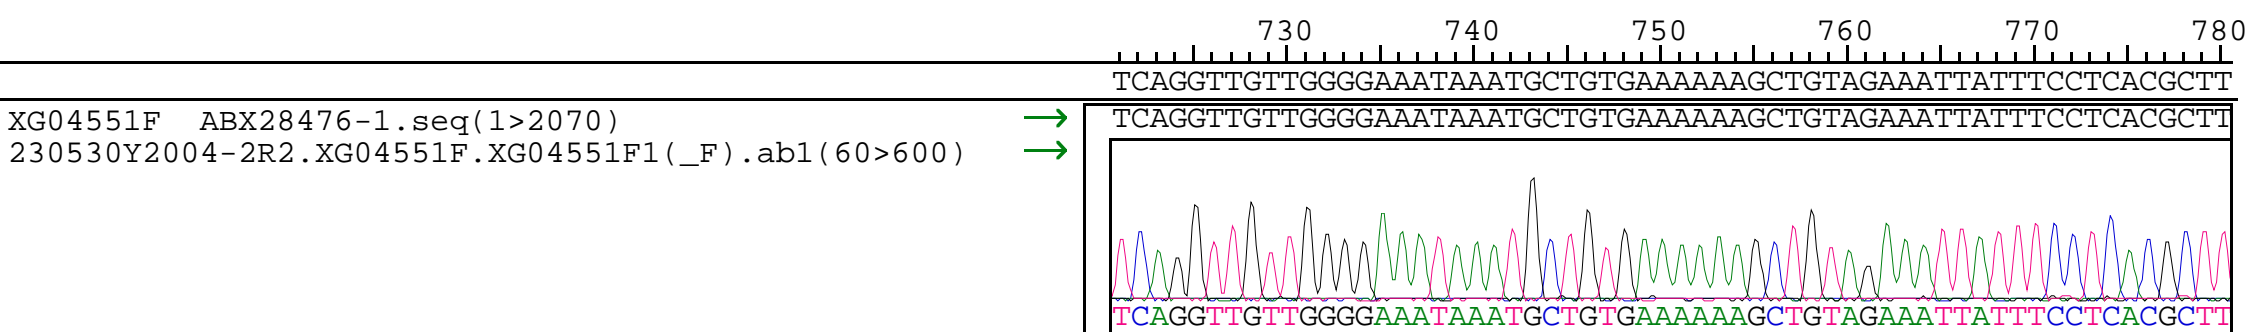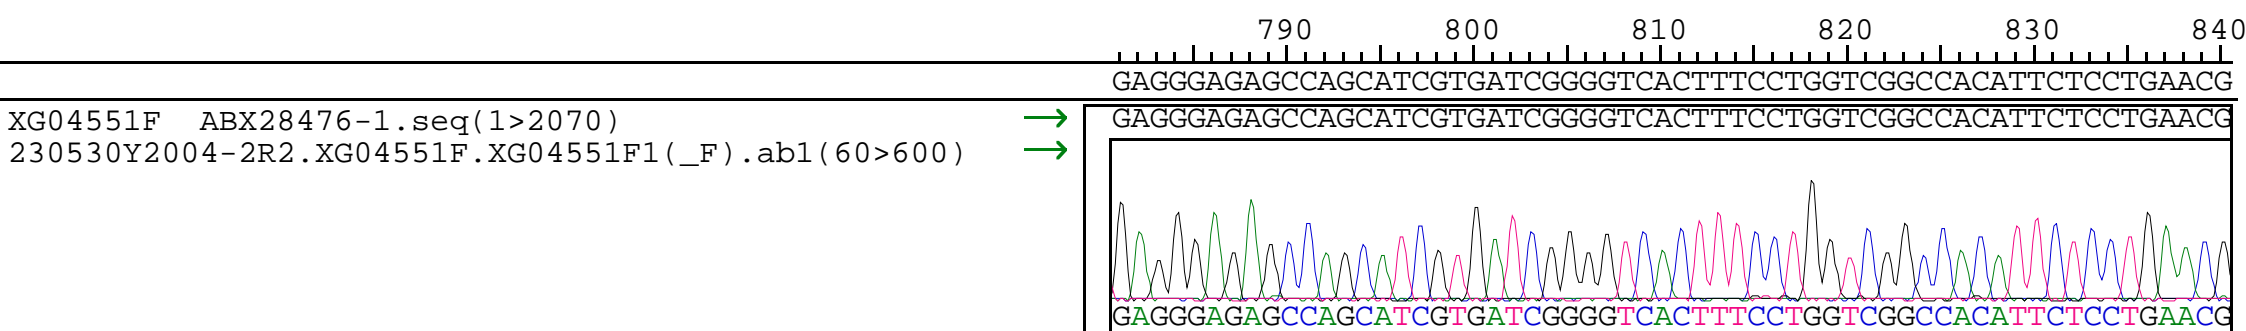

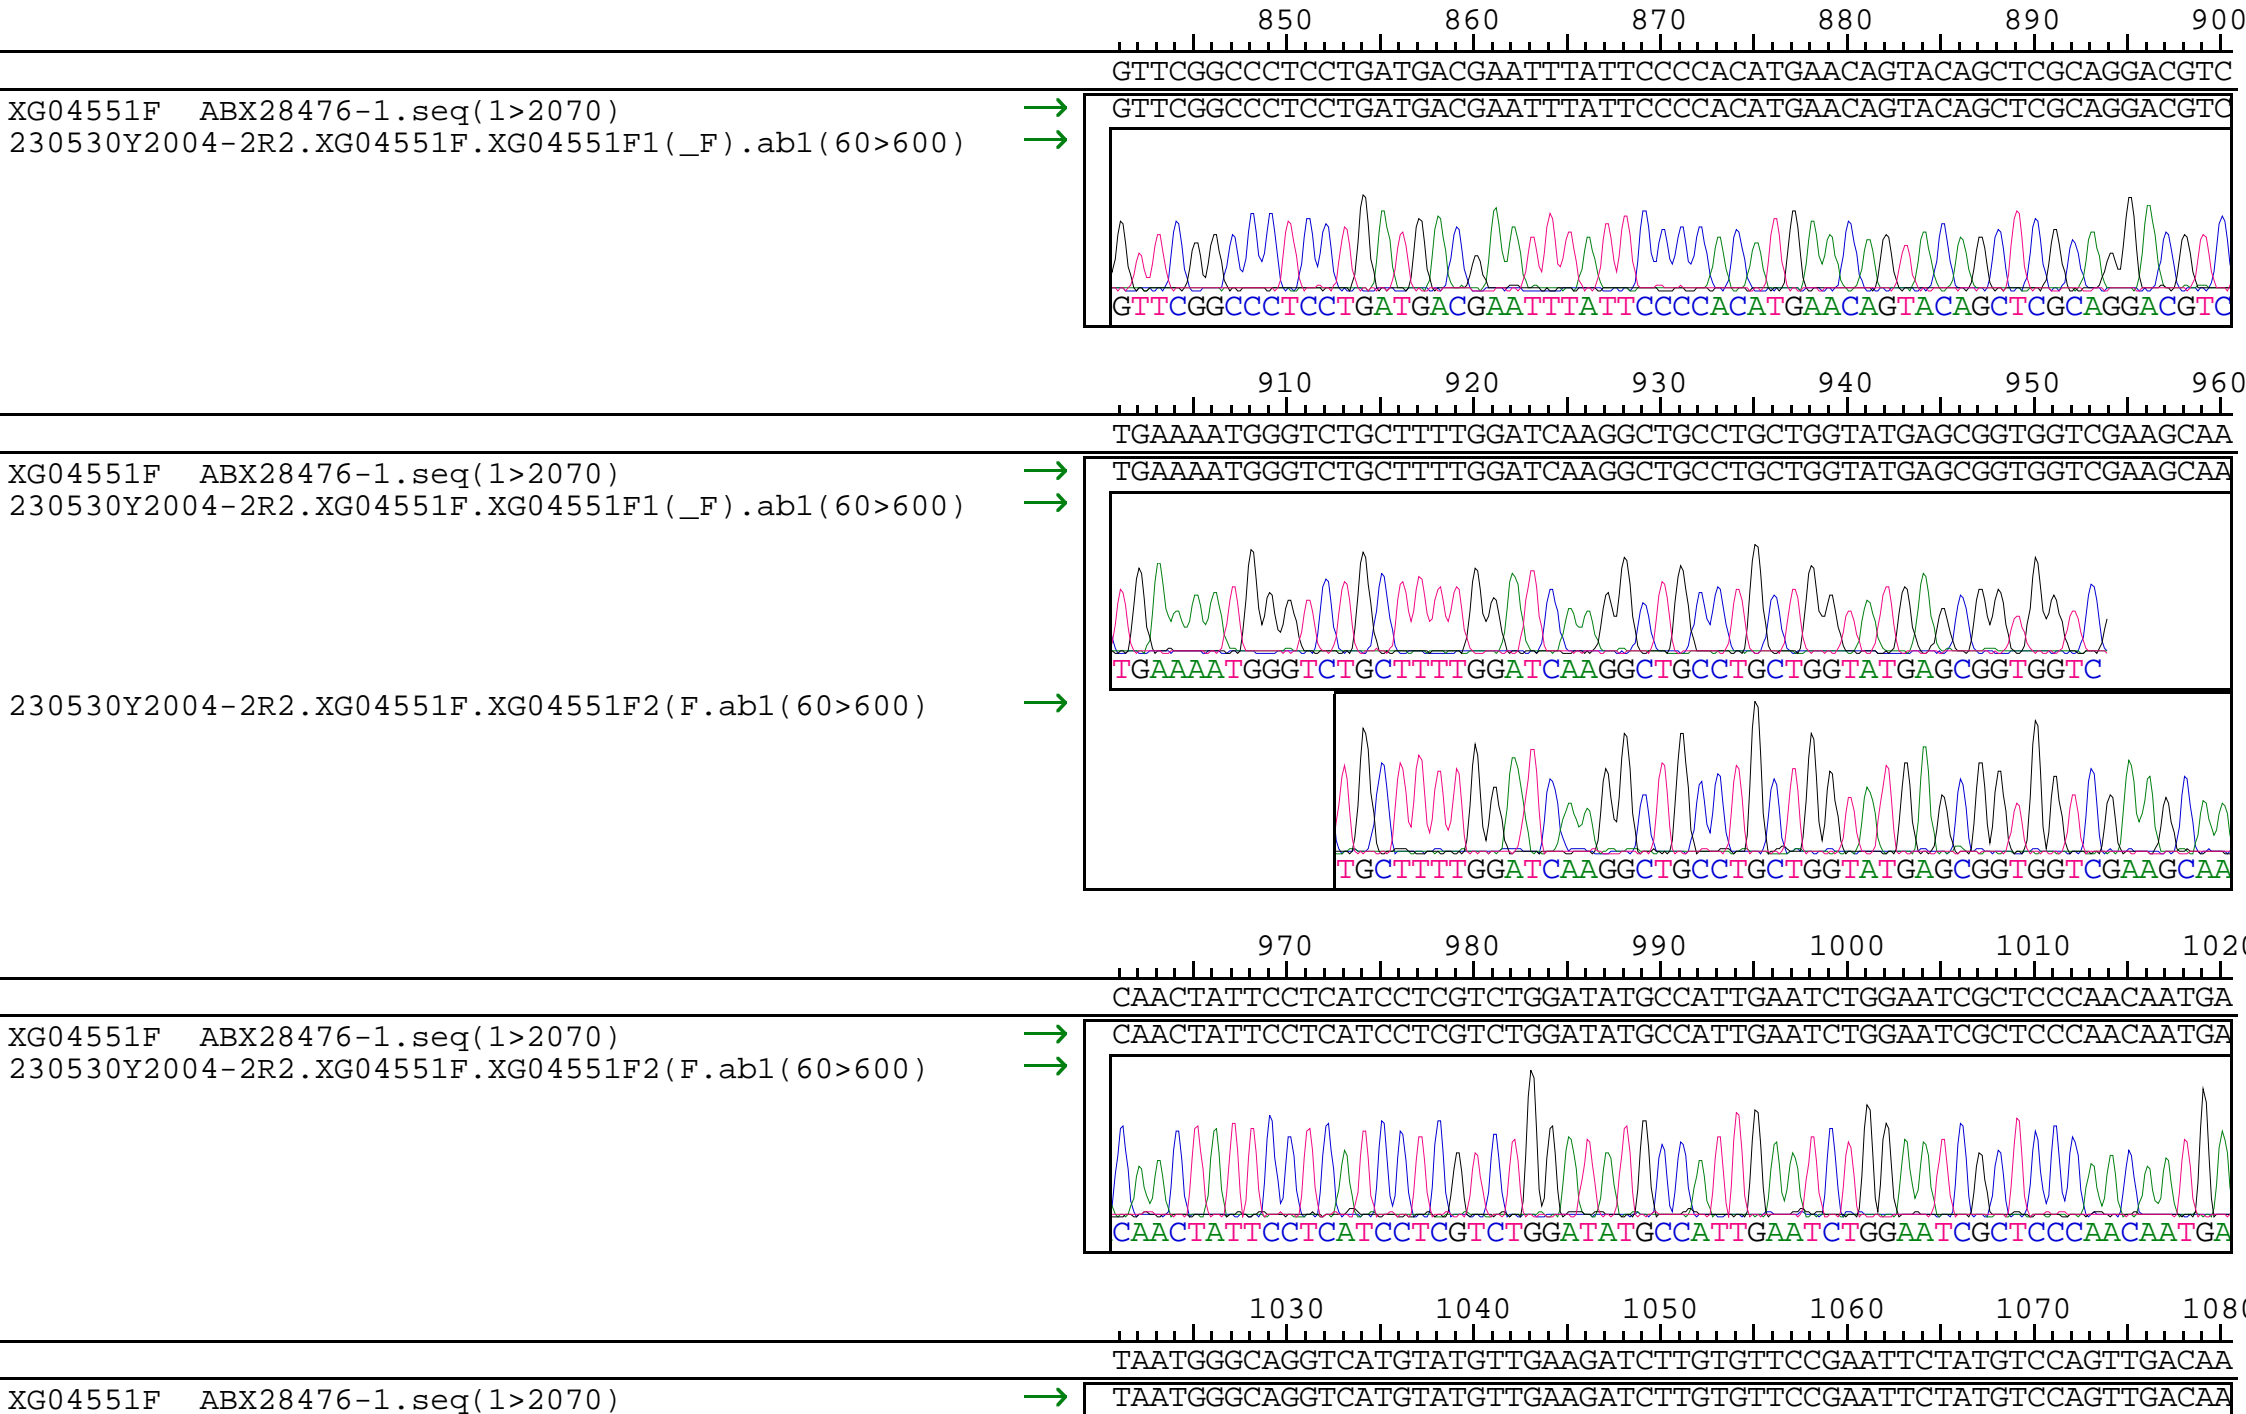

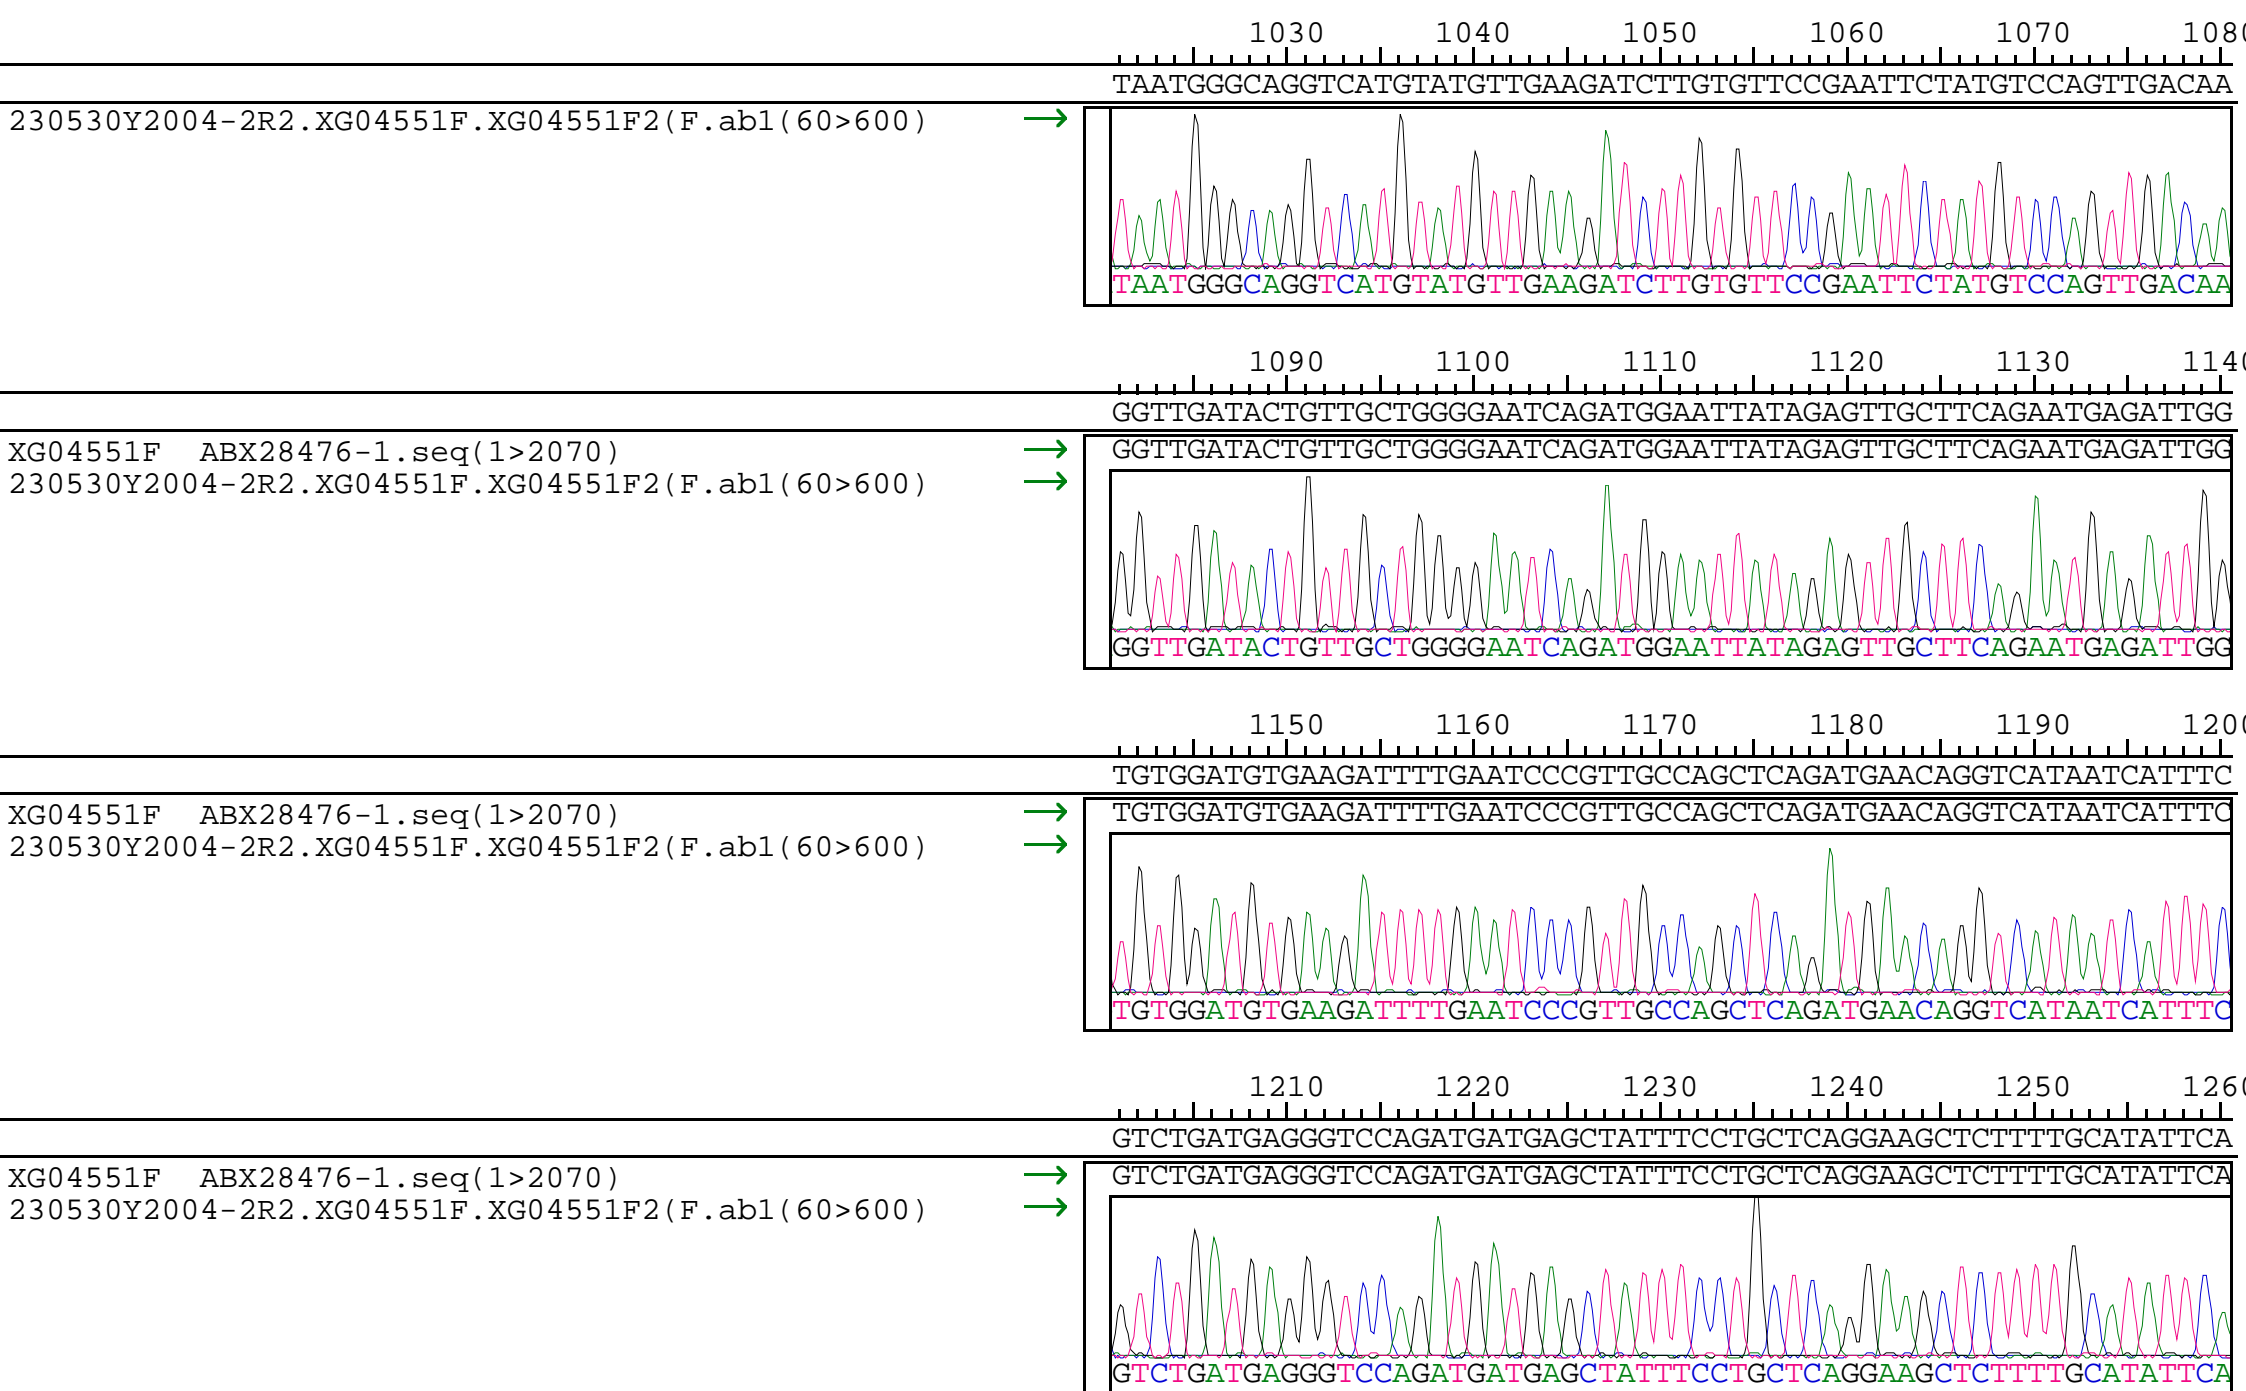

XG04551F ABX28476-1.seq(1>2070)  
230530Y2004-2R2.XG04551F.XG04551F2(F.ab1(60>600))

→

→

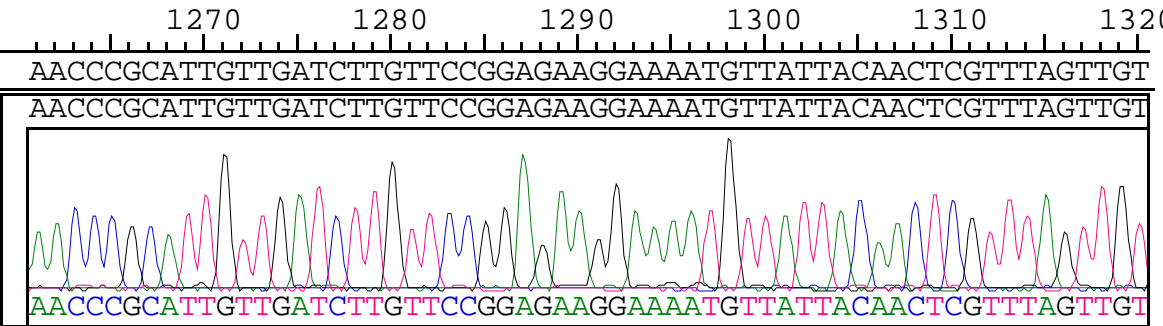

XG04551F ABX28476-1.seq(1>2070)  
230530Y2004-2R2.XG04551F.XG04551F2(F.ab1(60>600))

→

→

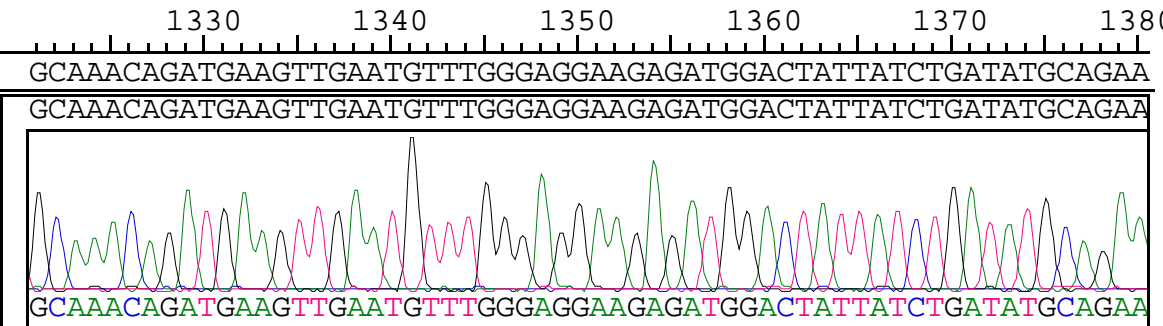

XG04551F ABX28476-1.seq(1>2070)  
230530Y2004-2R2.XG04551F.XG04551F2(F.ab1(60>600))

→

→

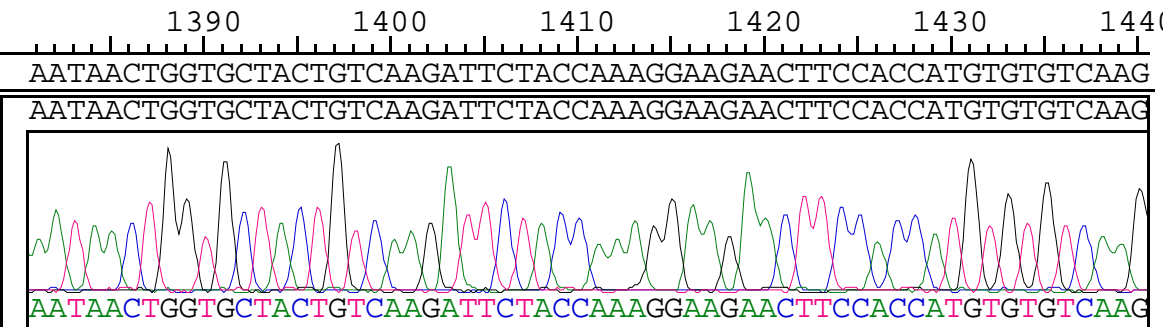

230530Y2004-2R2.XG04551F.XG04551F3(\_F).ab1(60>600)

→

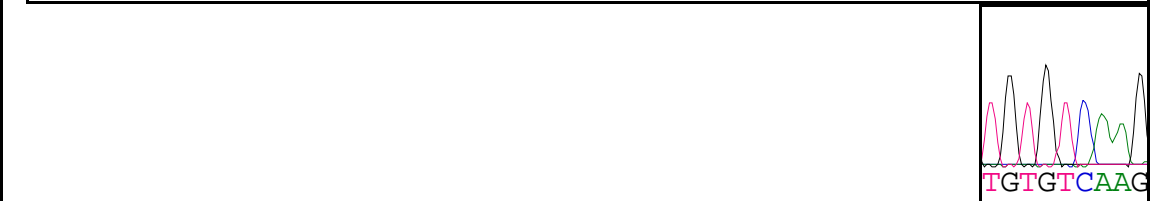

XG04551F ABX28476-1.seq(1>2070)

→

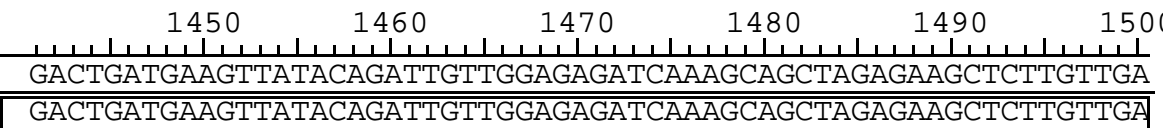

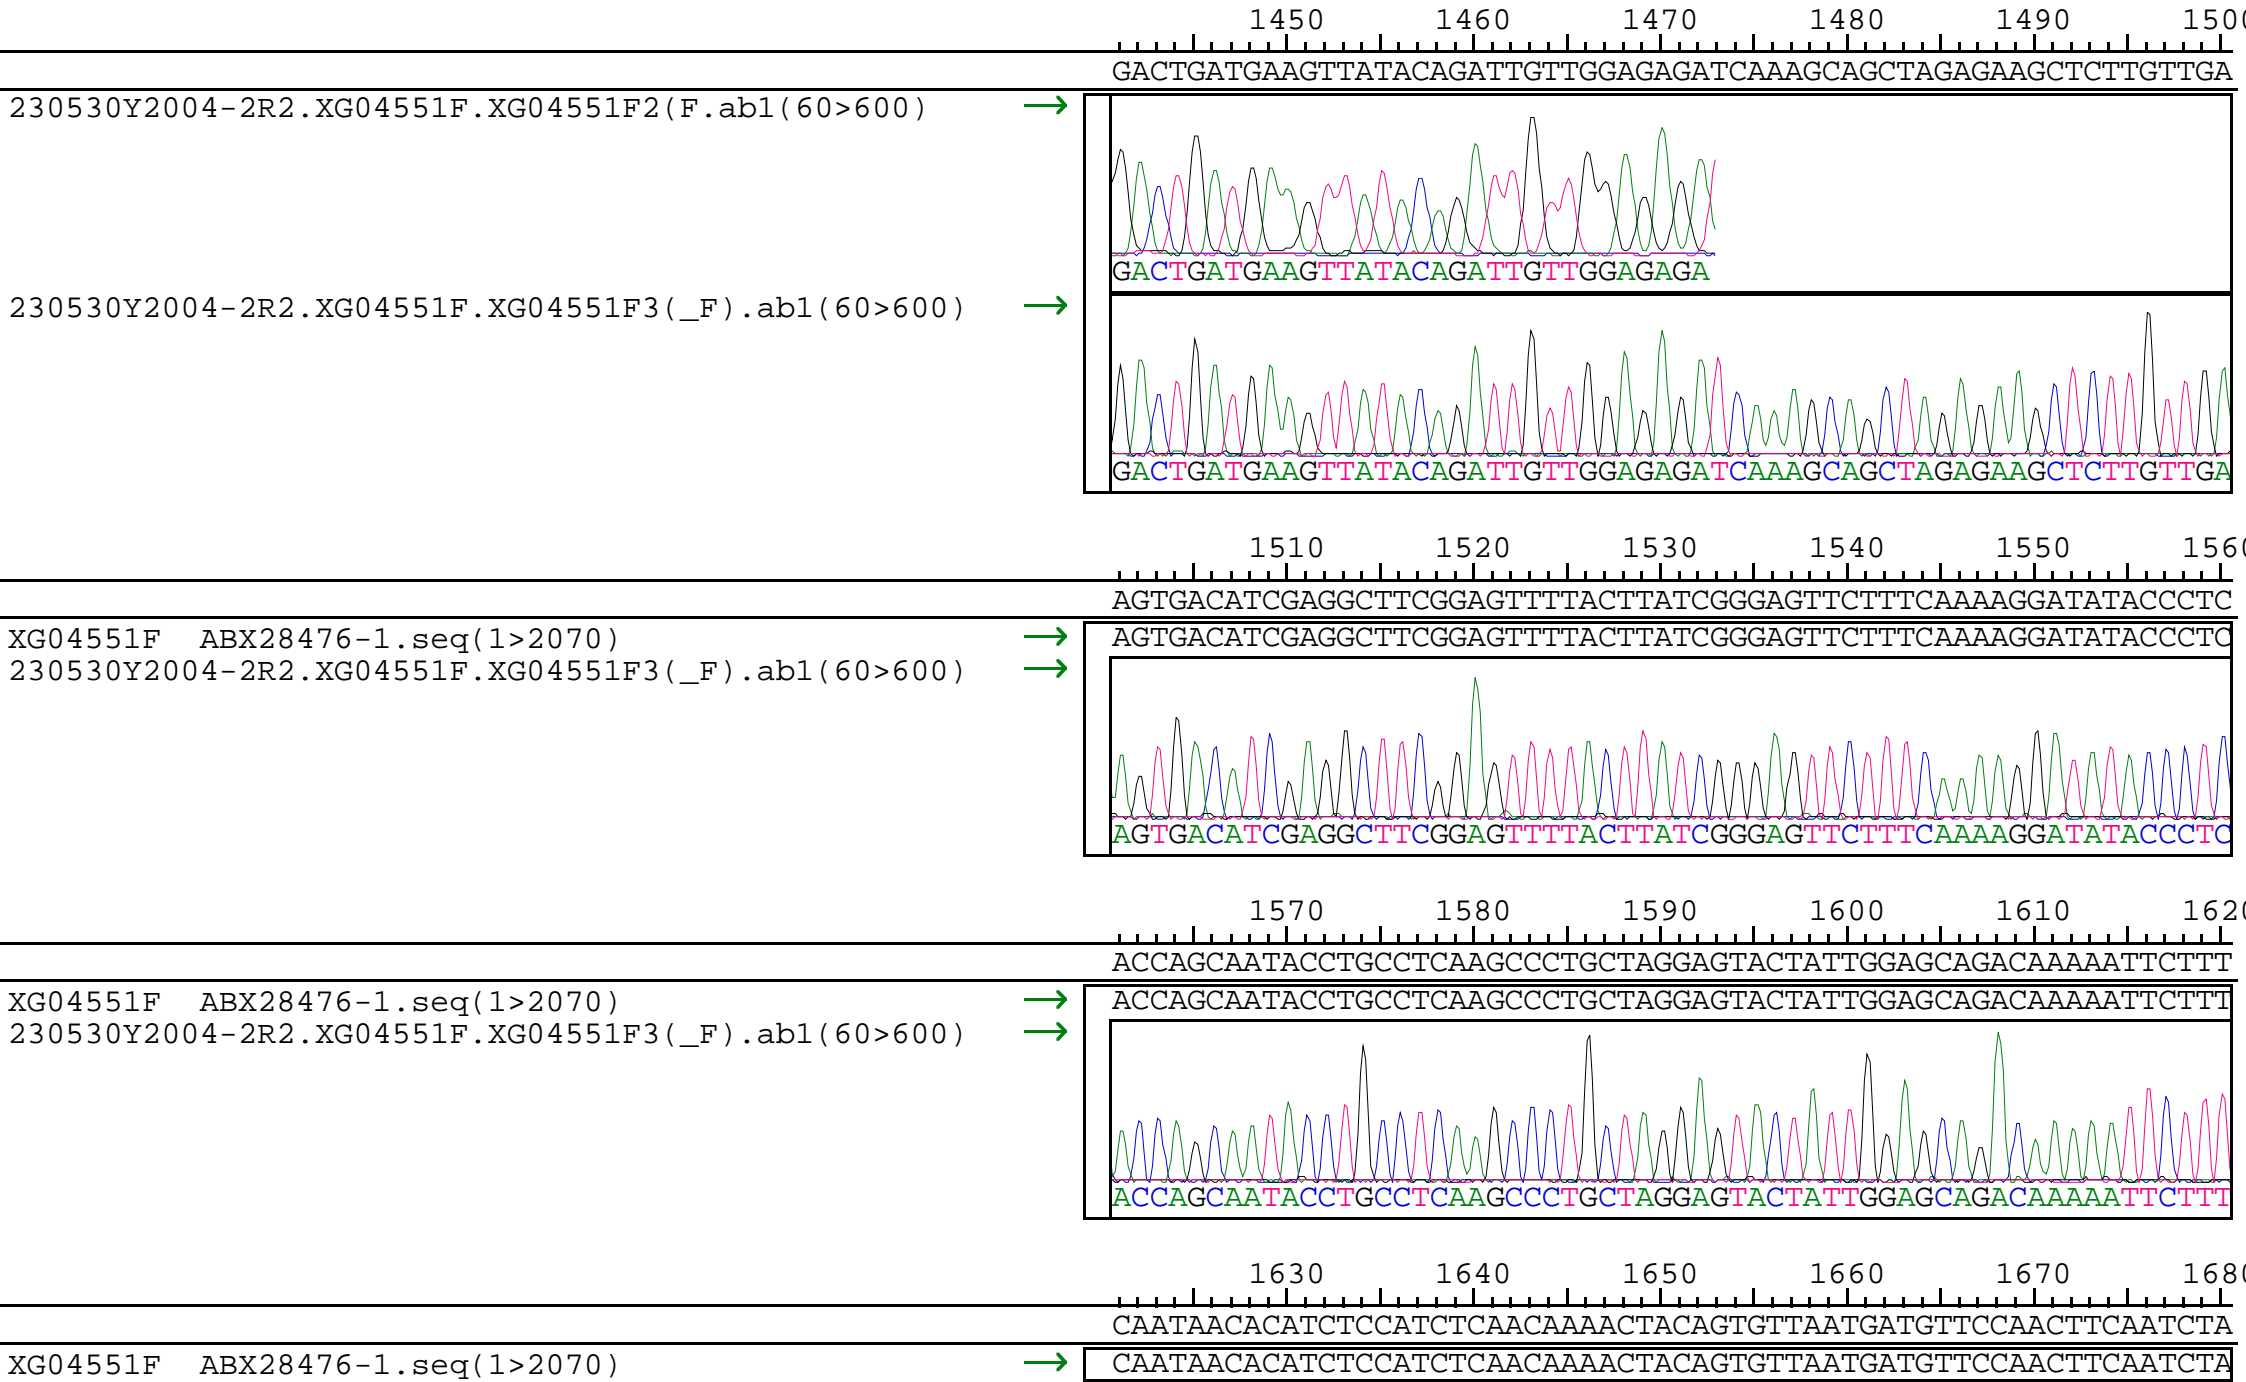



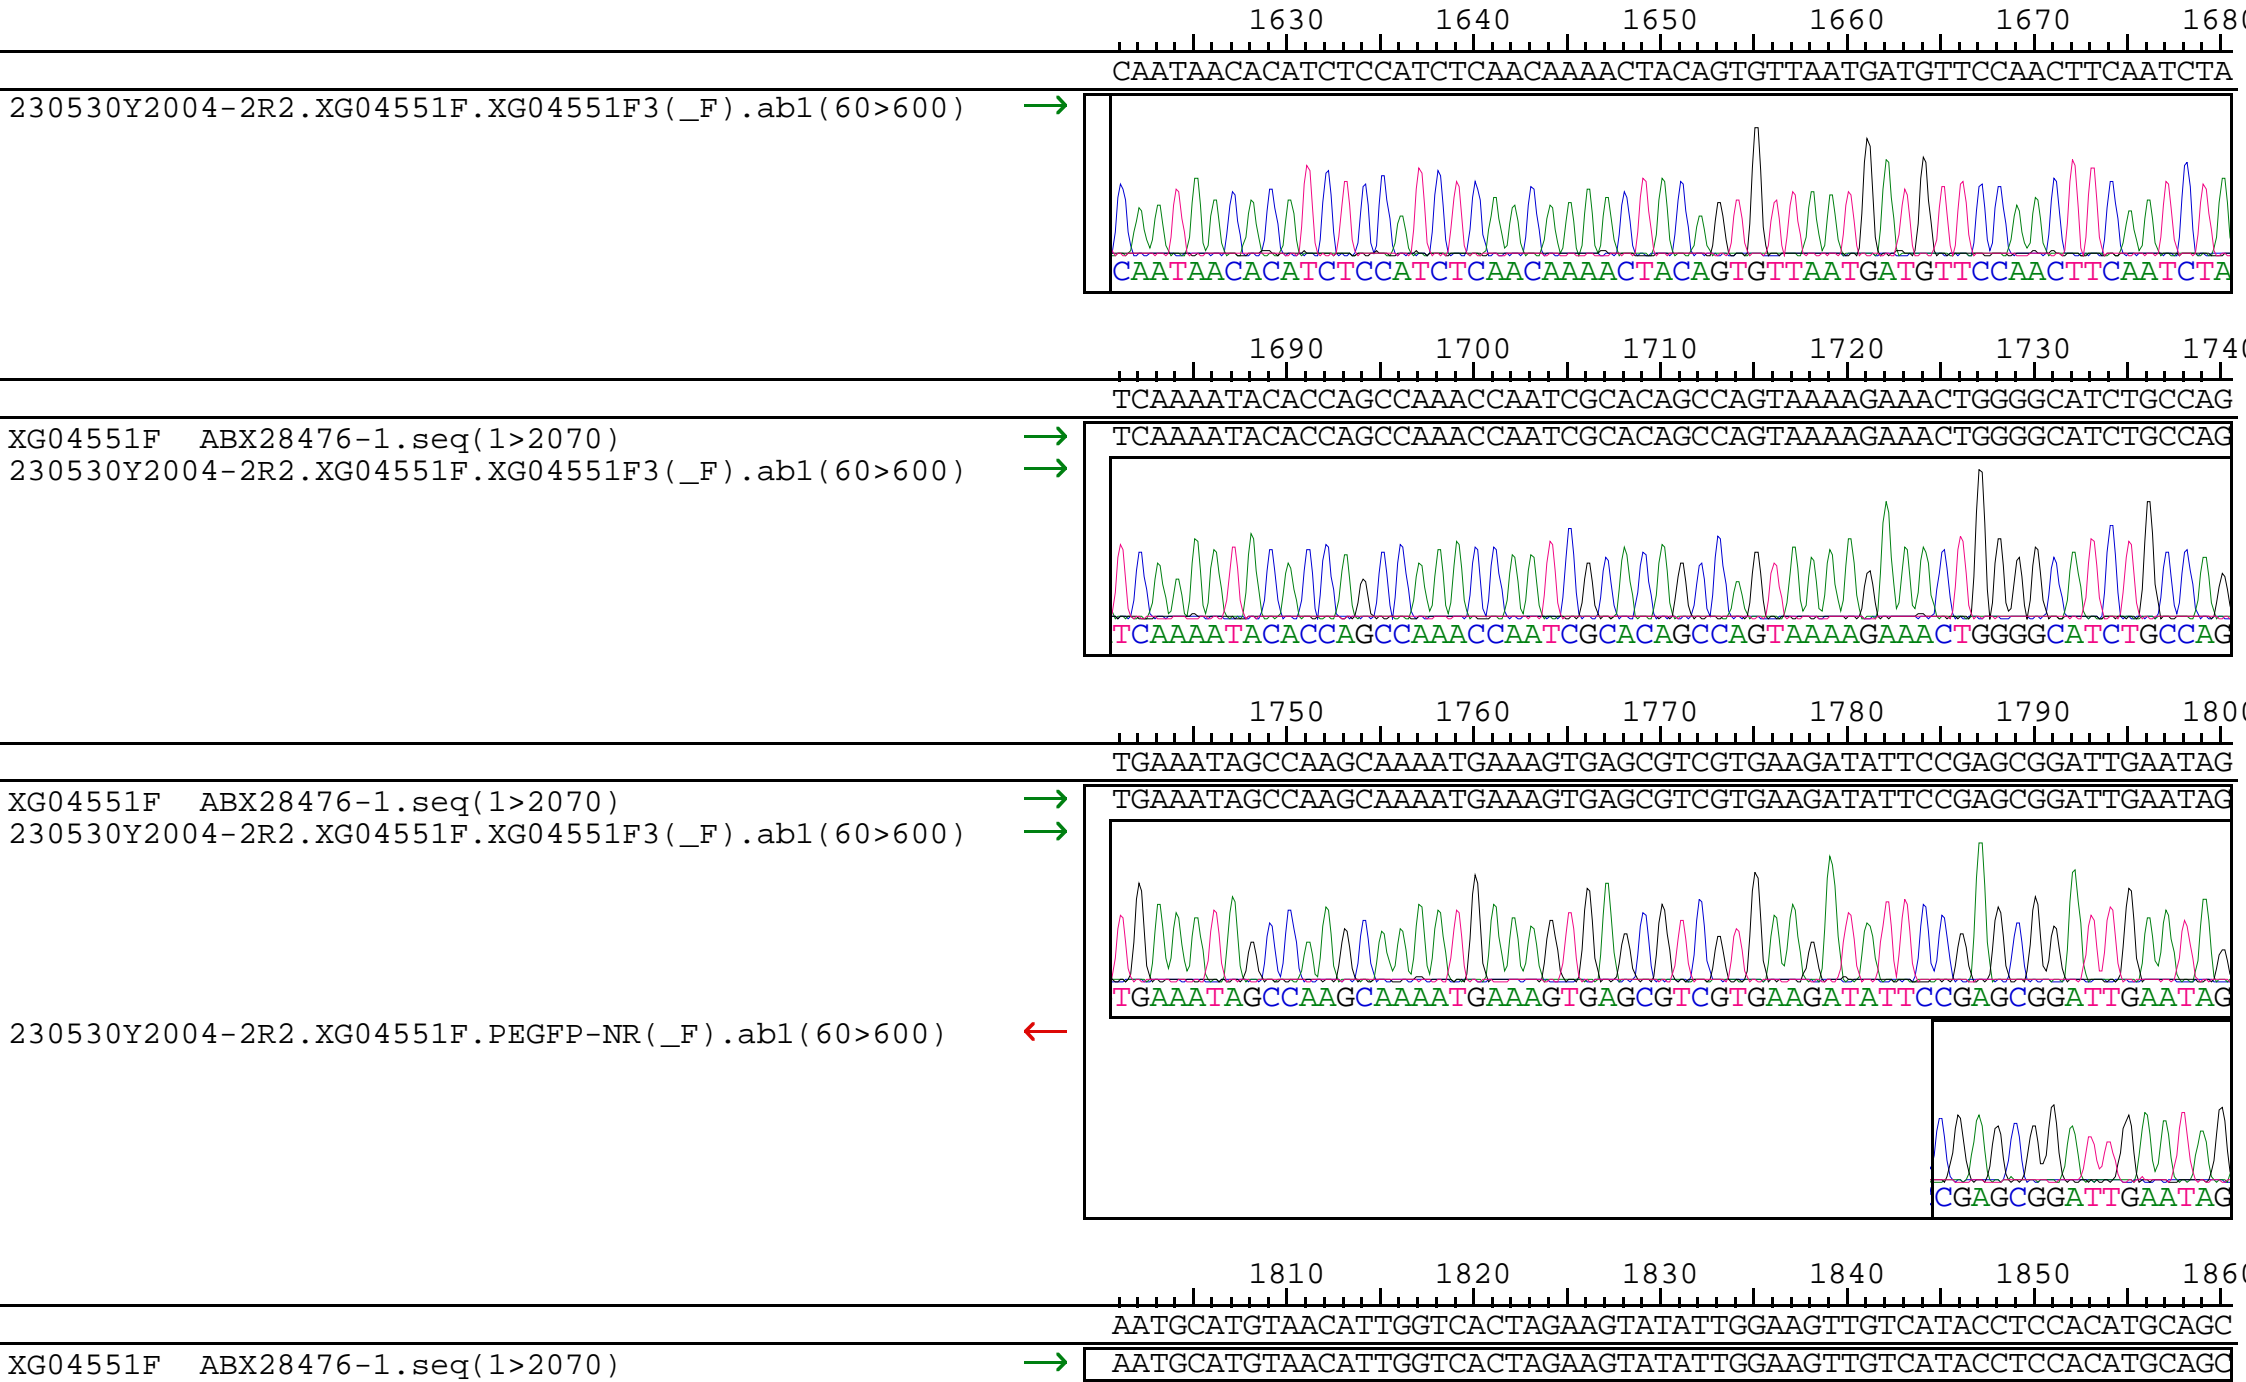

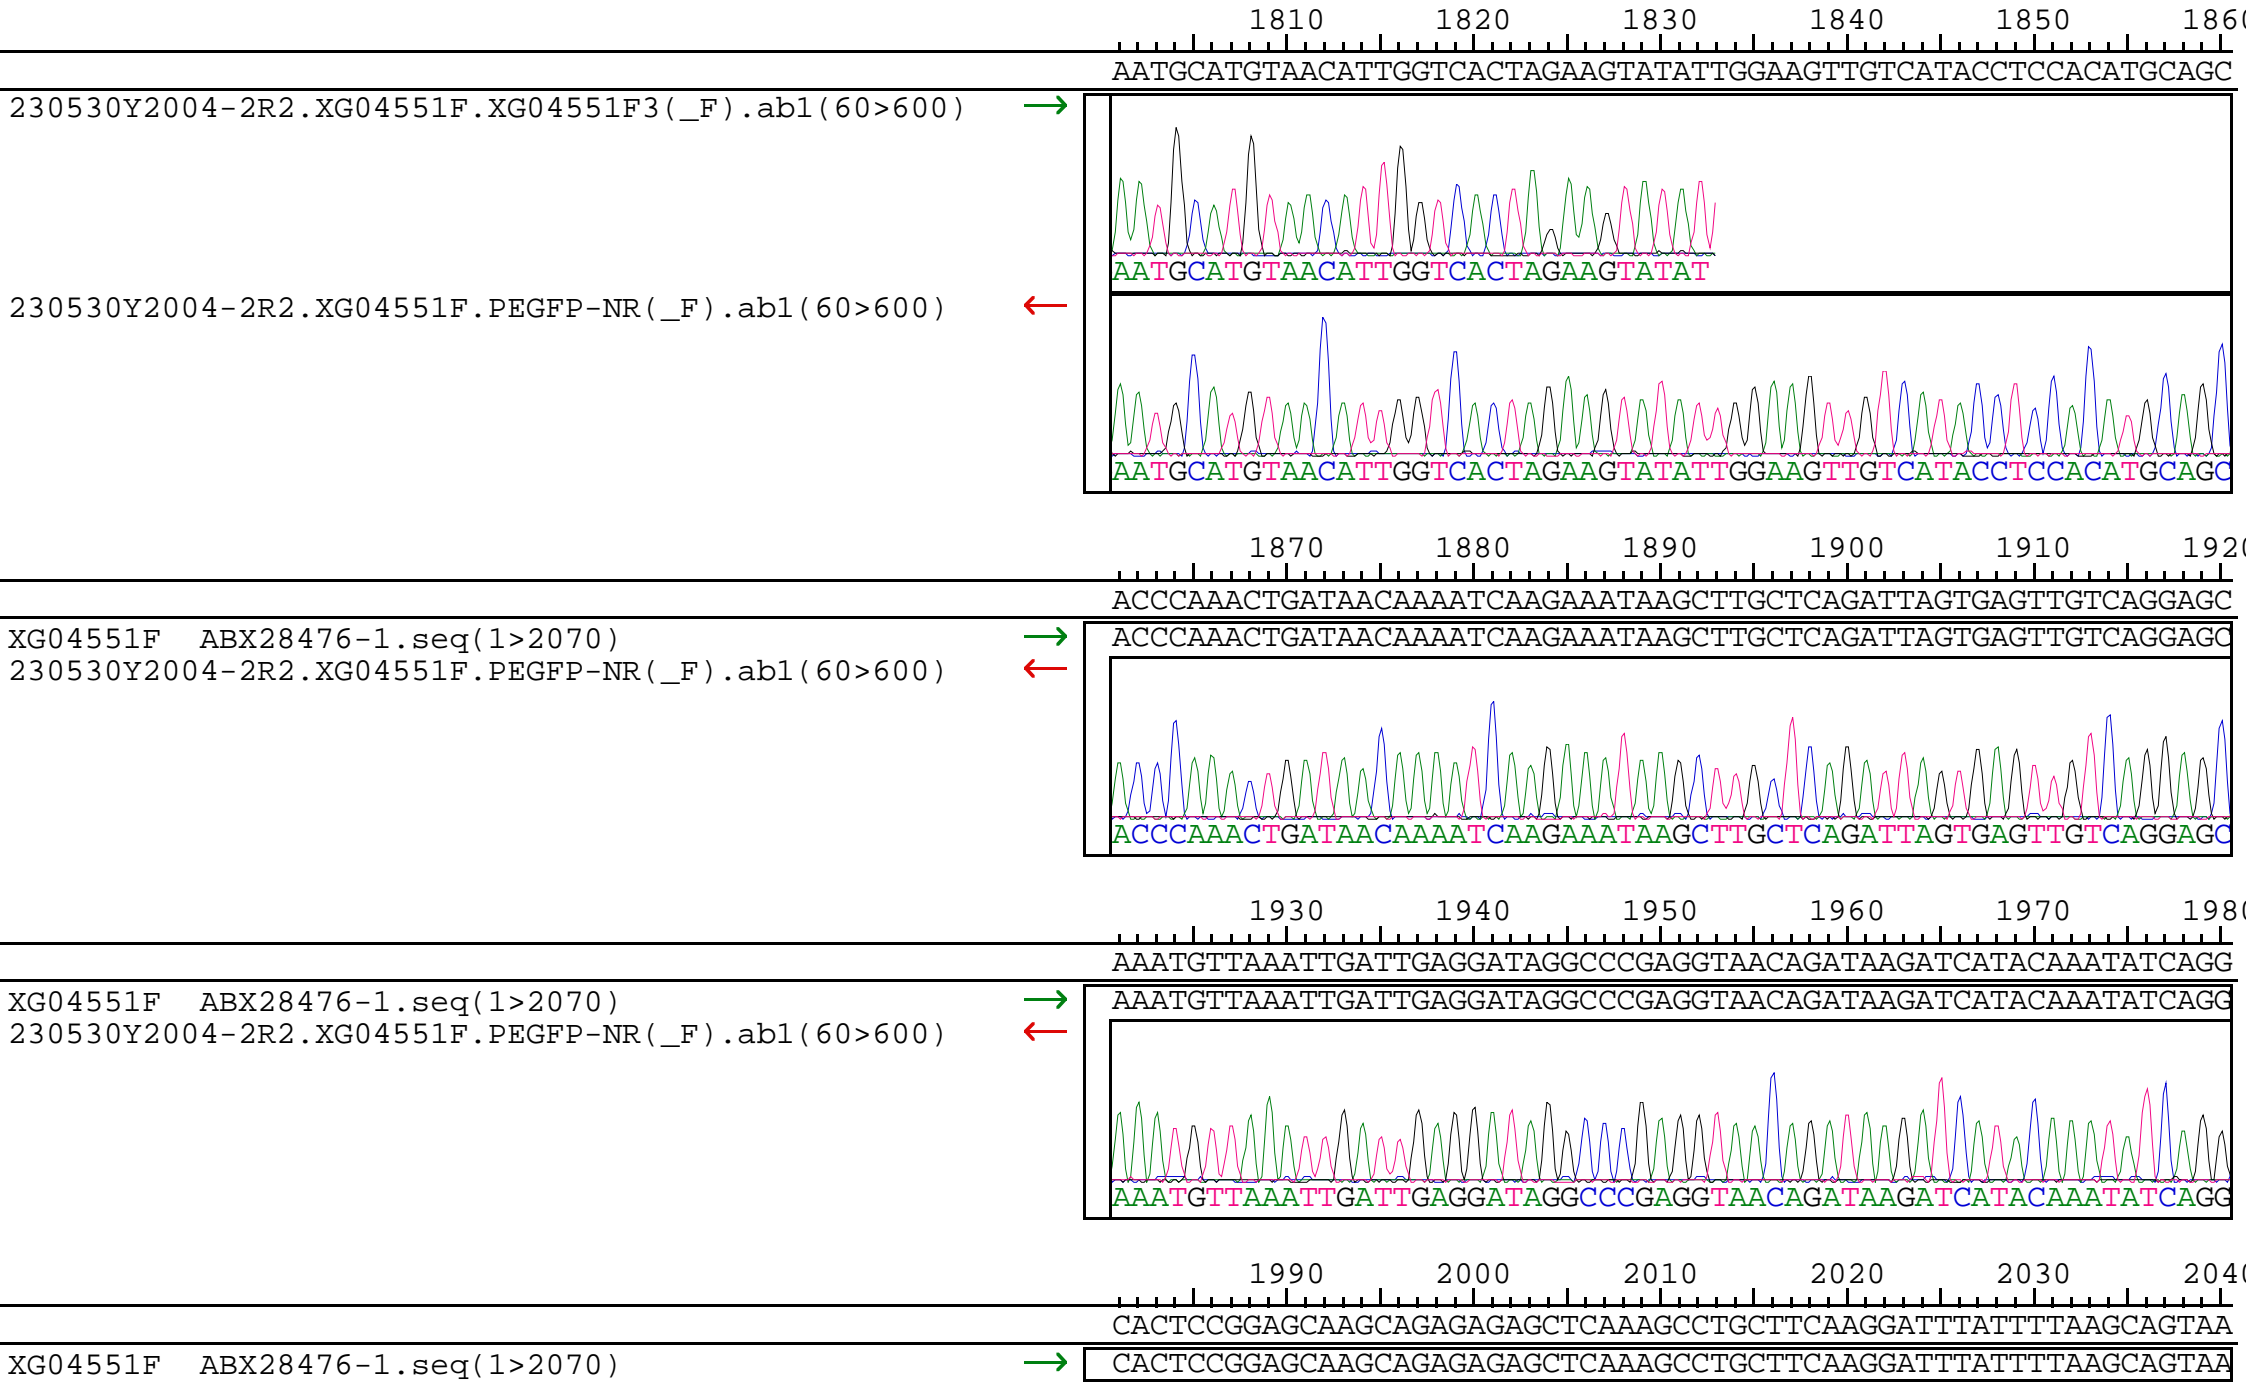

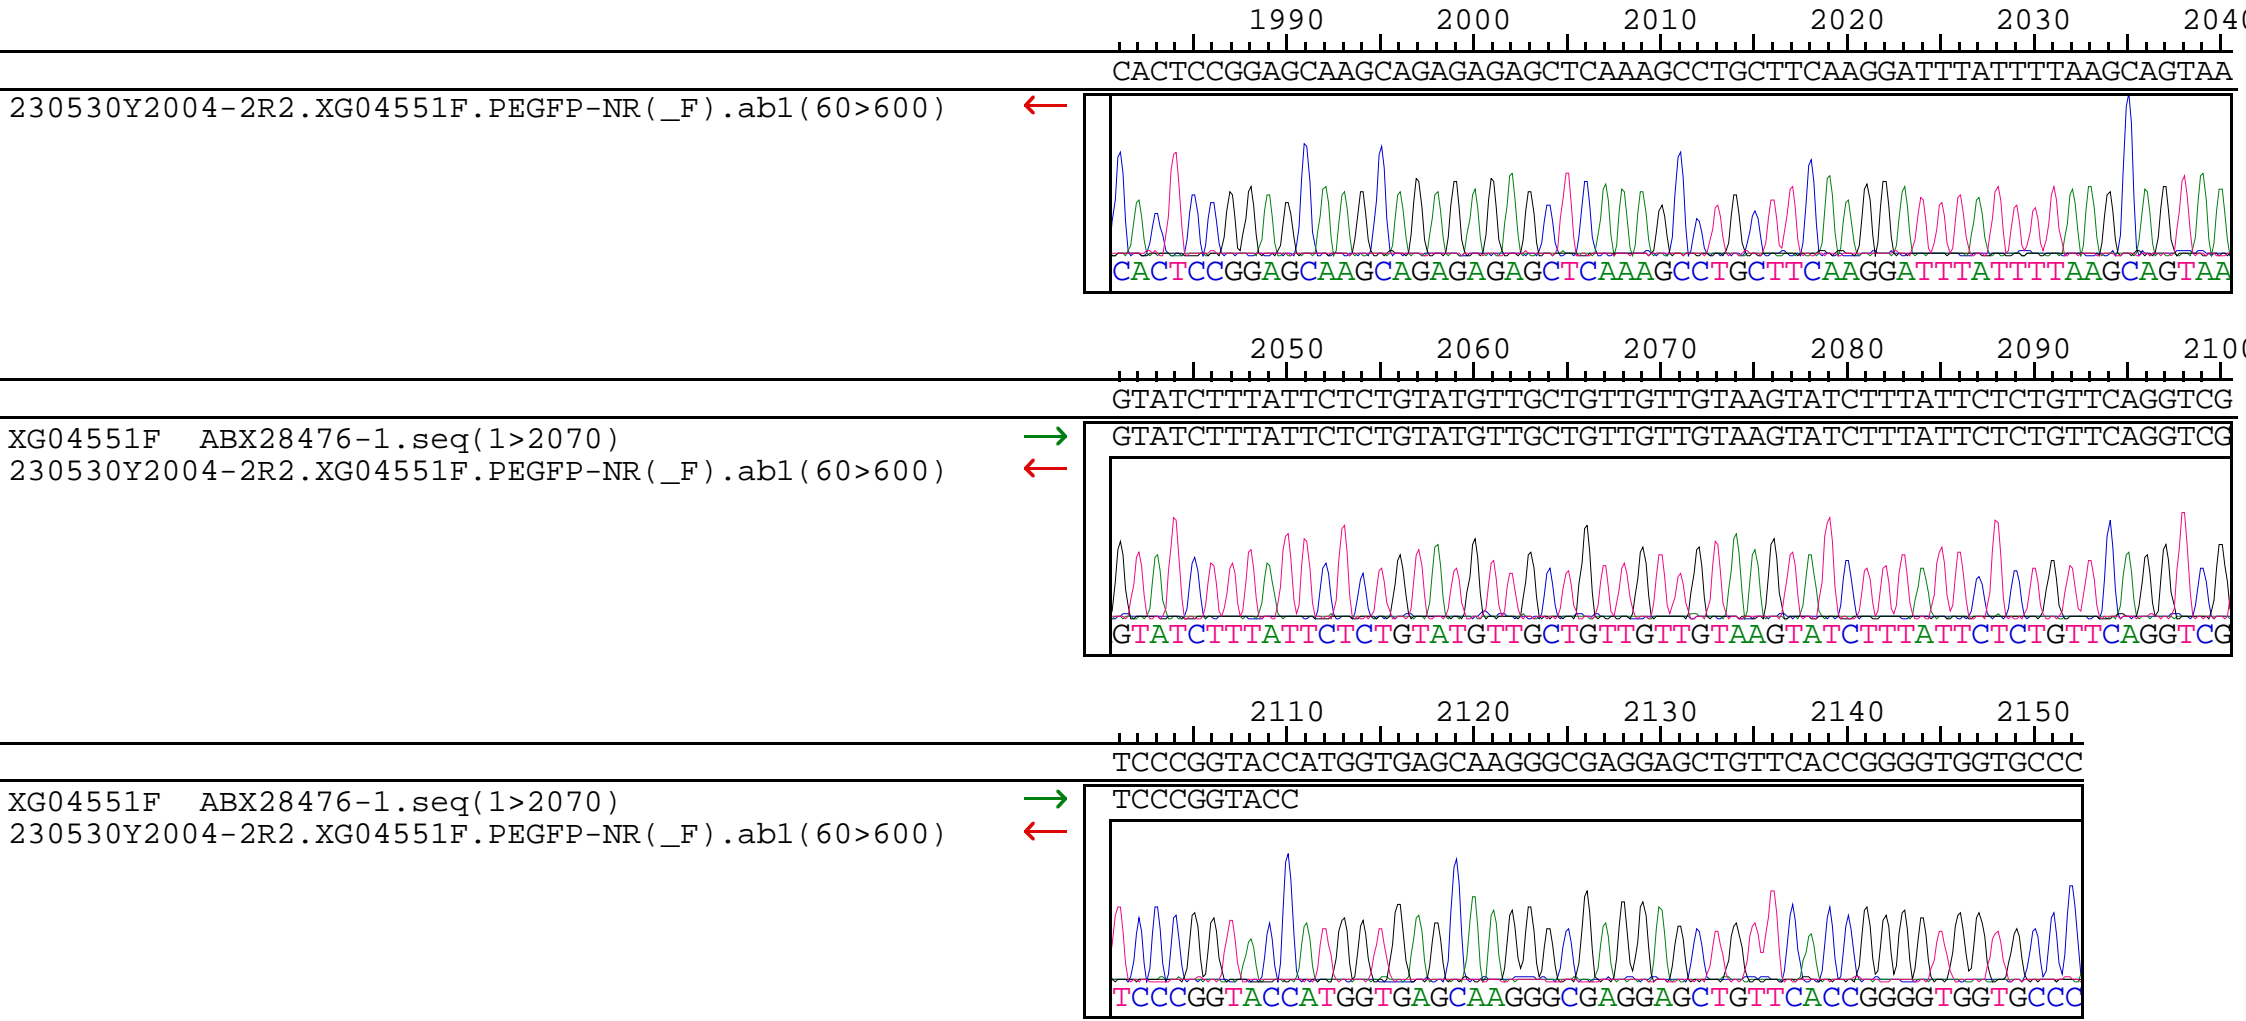

Supplement: s1 [file File S1 XG04551F ABX28476-1.pdf › File S1 XG04551F ABX28476-1.pdf]
