# Supplementary material
Source: MDPI journal article supplement (doi:10.3390/horticulturae12050642)
Supplement: s1 [file Figure S1. Three-dimensional structure of StKHDs proteins.pdf › Figure S1. Three-dimensional structure of StKHDs proteins.pdf]

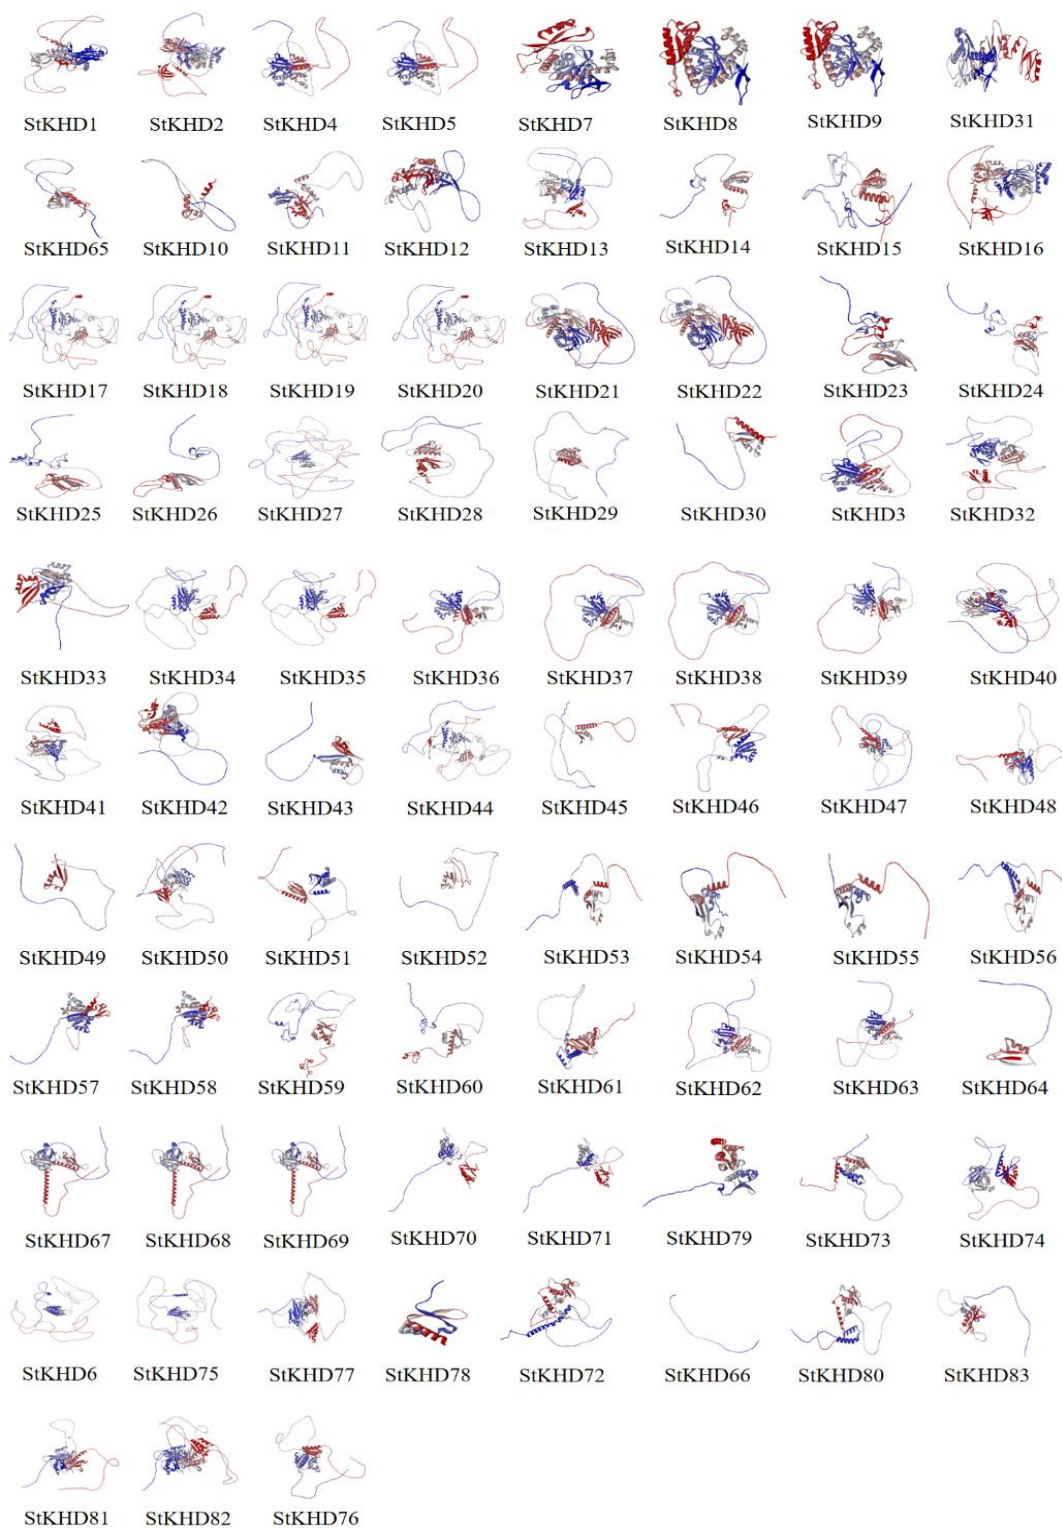

**Figure S1** The three-dimensional structure of StKHDs. The amino acid residues are depicted using a color gradient ranging from blue at the N-terminus to red at the C-terminus. The structural predictions for all StKHDs were generated using the AlphaFold protein structure database, which utilizes advanced artificial intelligence algorithms to infer the three-dimensional conformation of a protein based on its amino acid sequence.
