# Supplementary material
Source: MDPI journal article supplement (doi:10.3390/horticulturae12050642)

**Figure S2** The number of *cis*-acting elements on promoters of *StKHDs*.

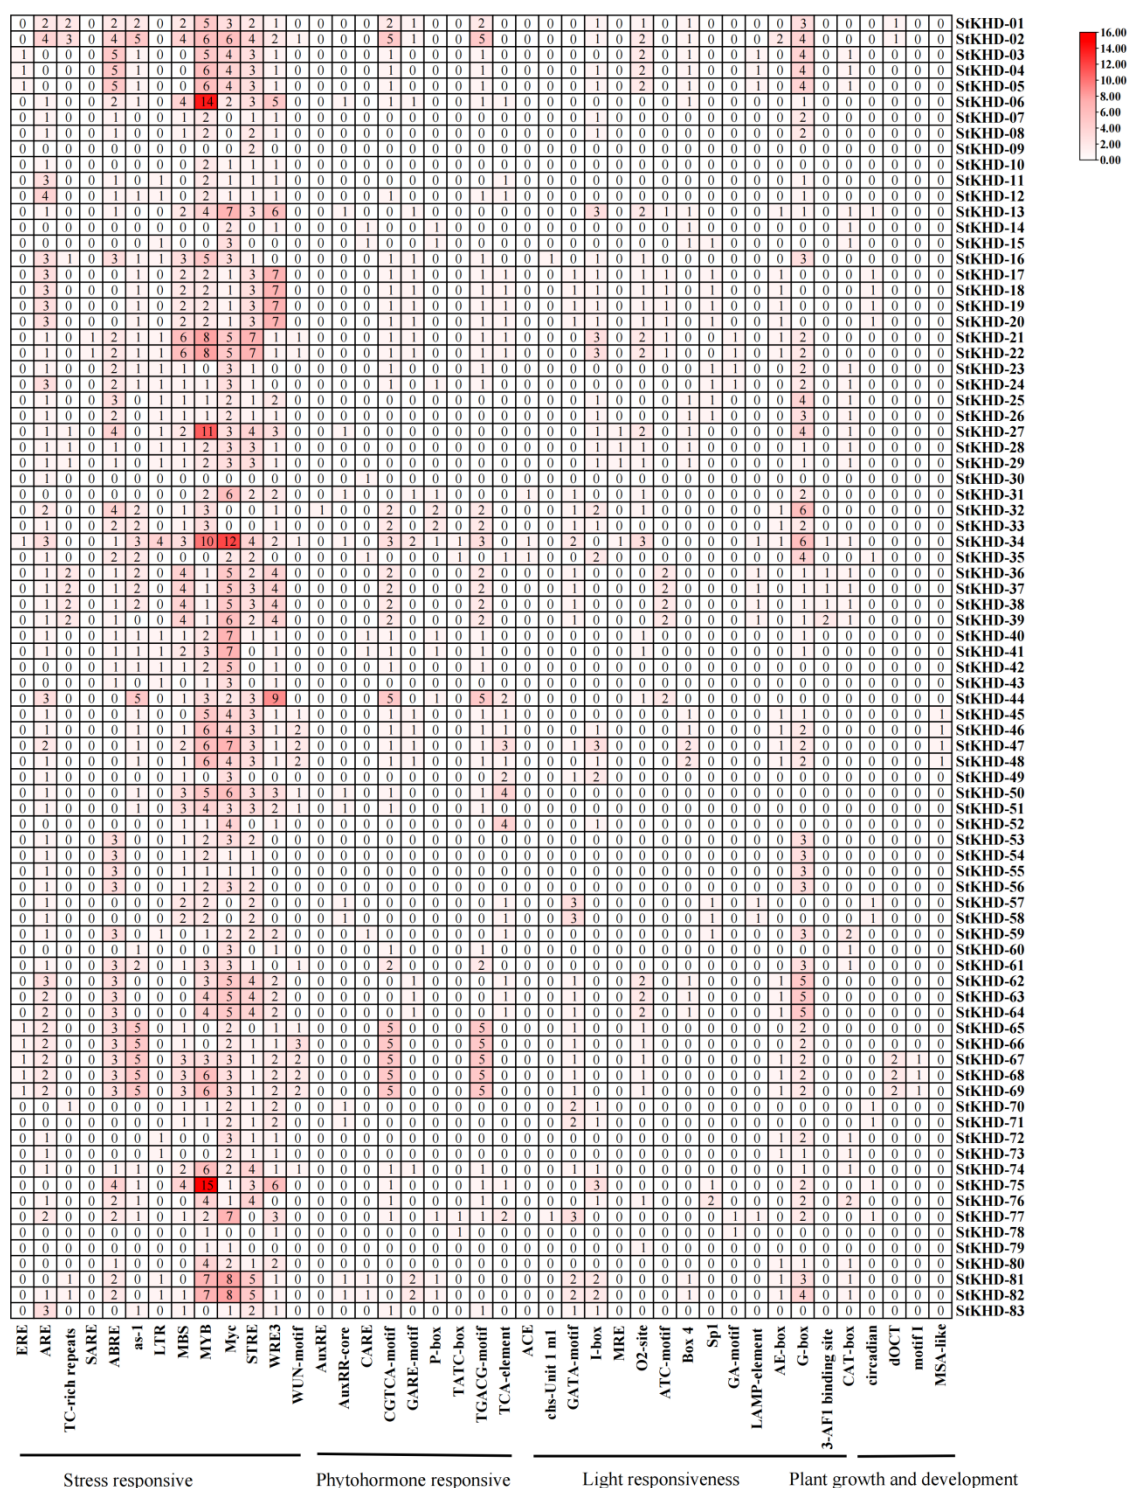

Supplement: s1 [file Figure S2. Number of cis–acting elements on promoters of KHD genes.pdf › Figure S2. Number of cis–acting elements on promoters of KHD genes.pdf]
